# Supplementary material
Source: PubMed Central journal article supplement (PMC3319279)

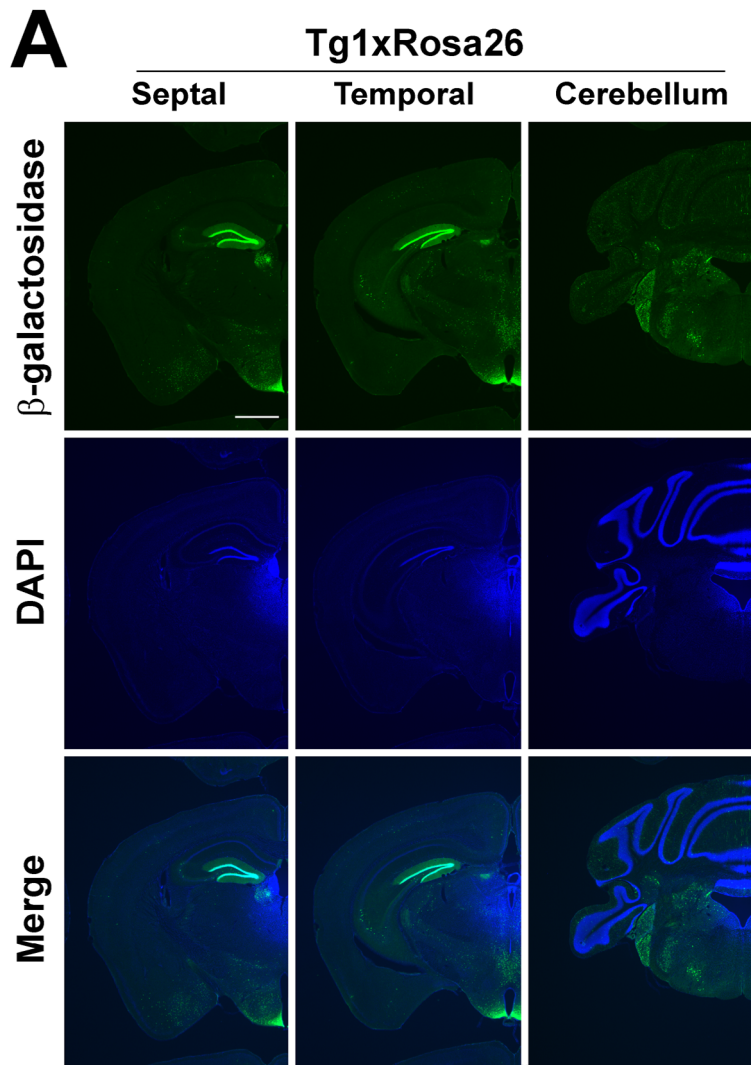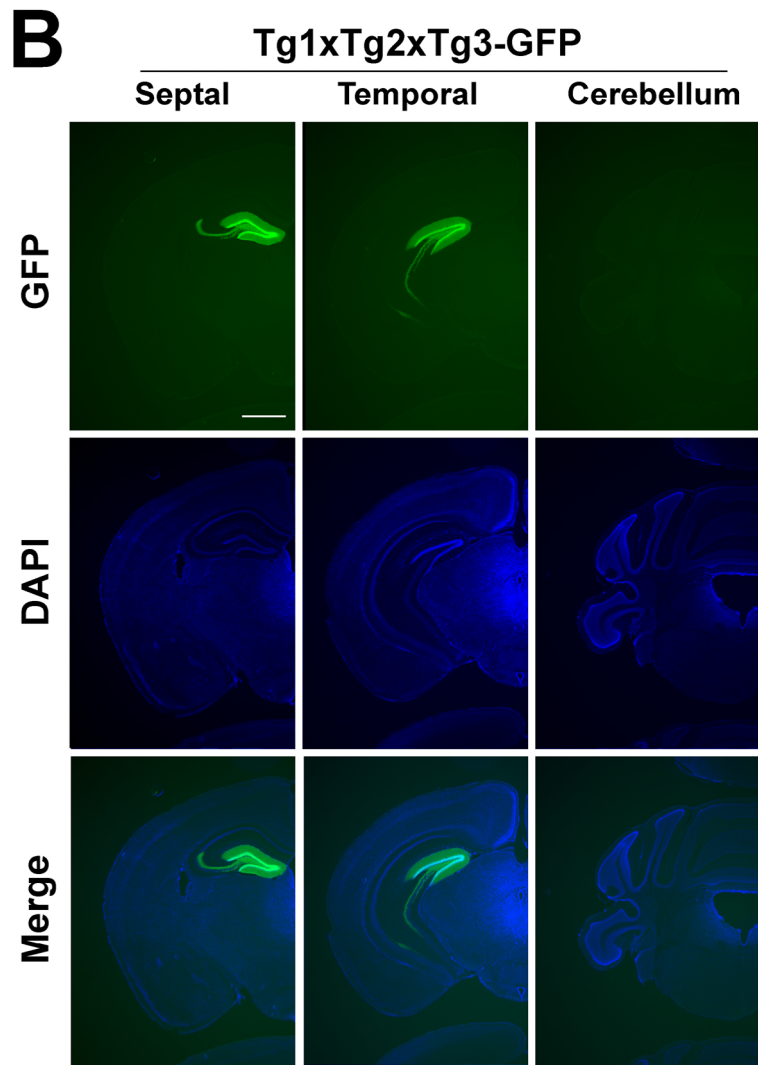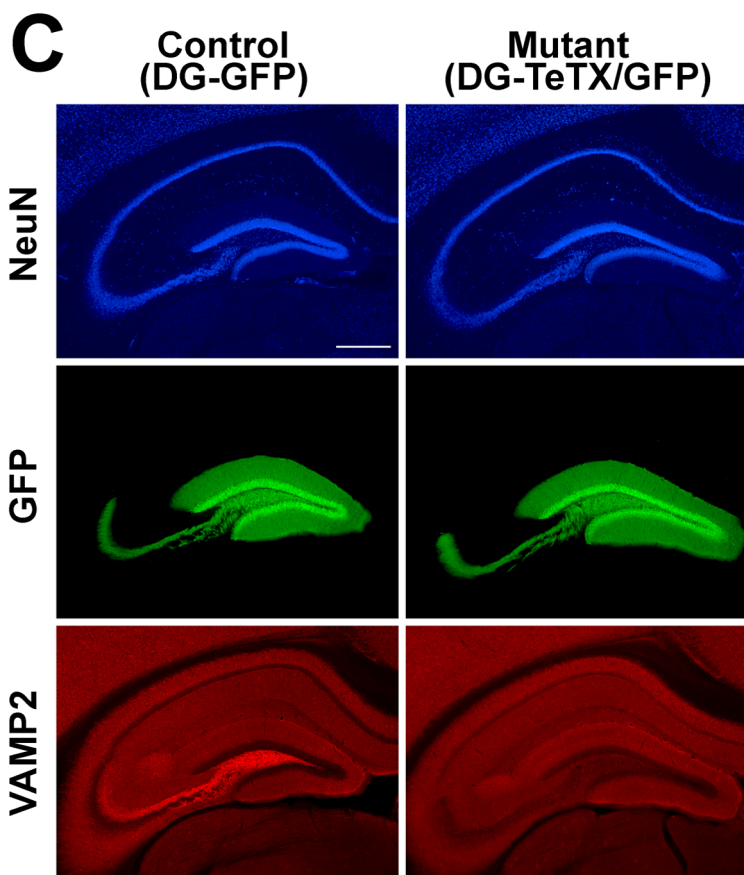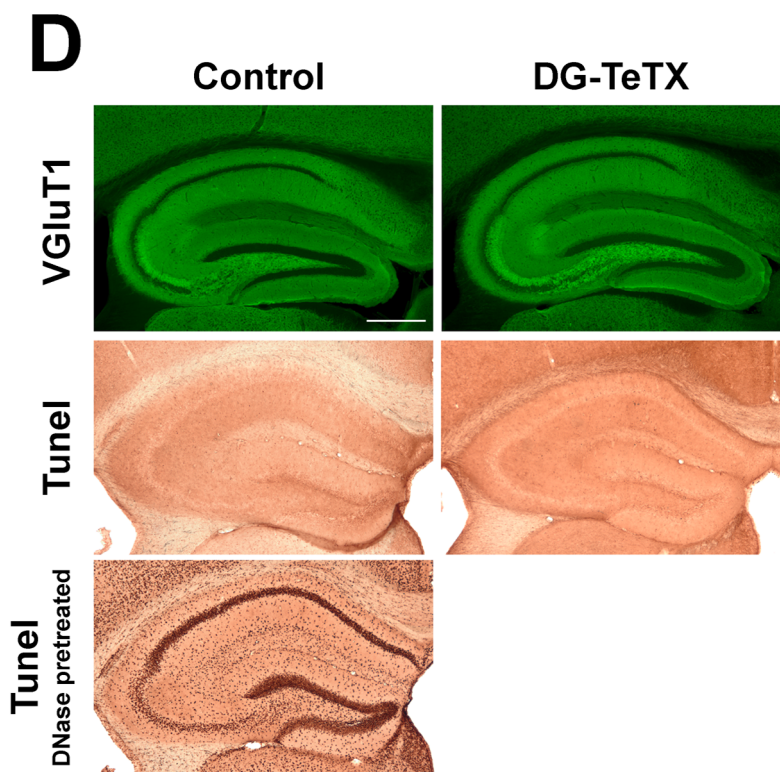

## Figure S2

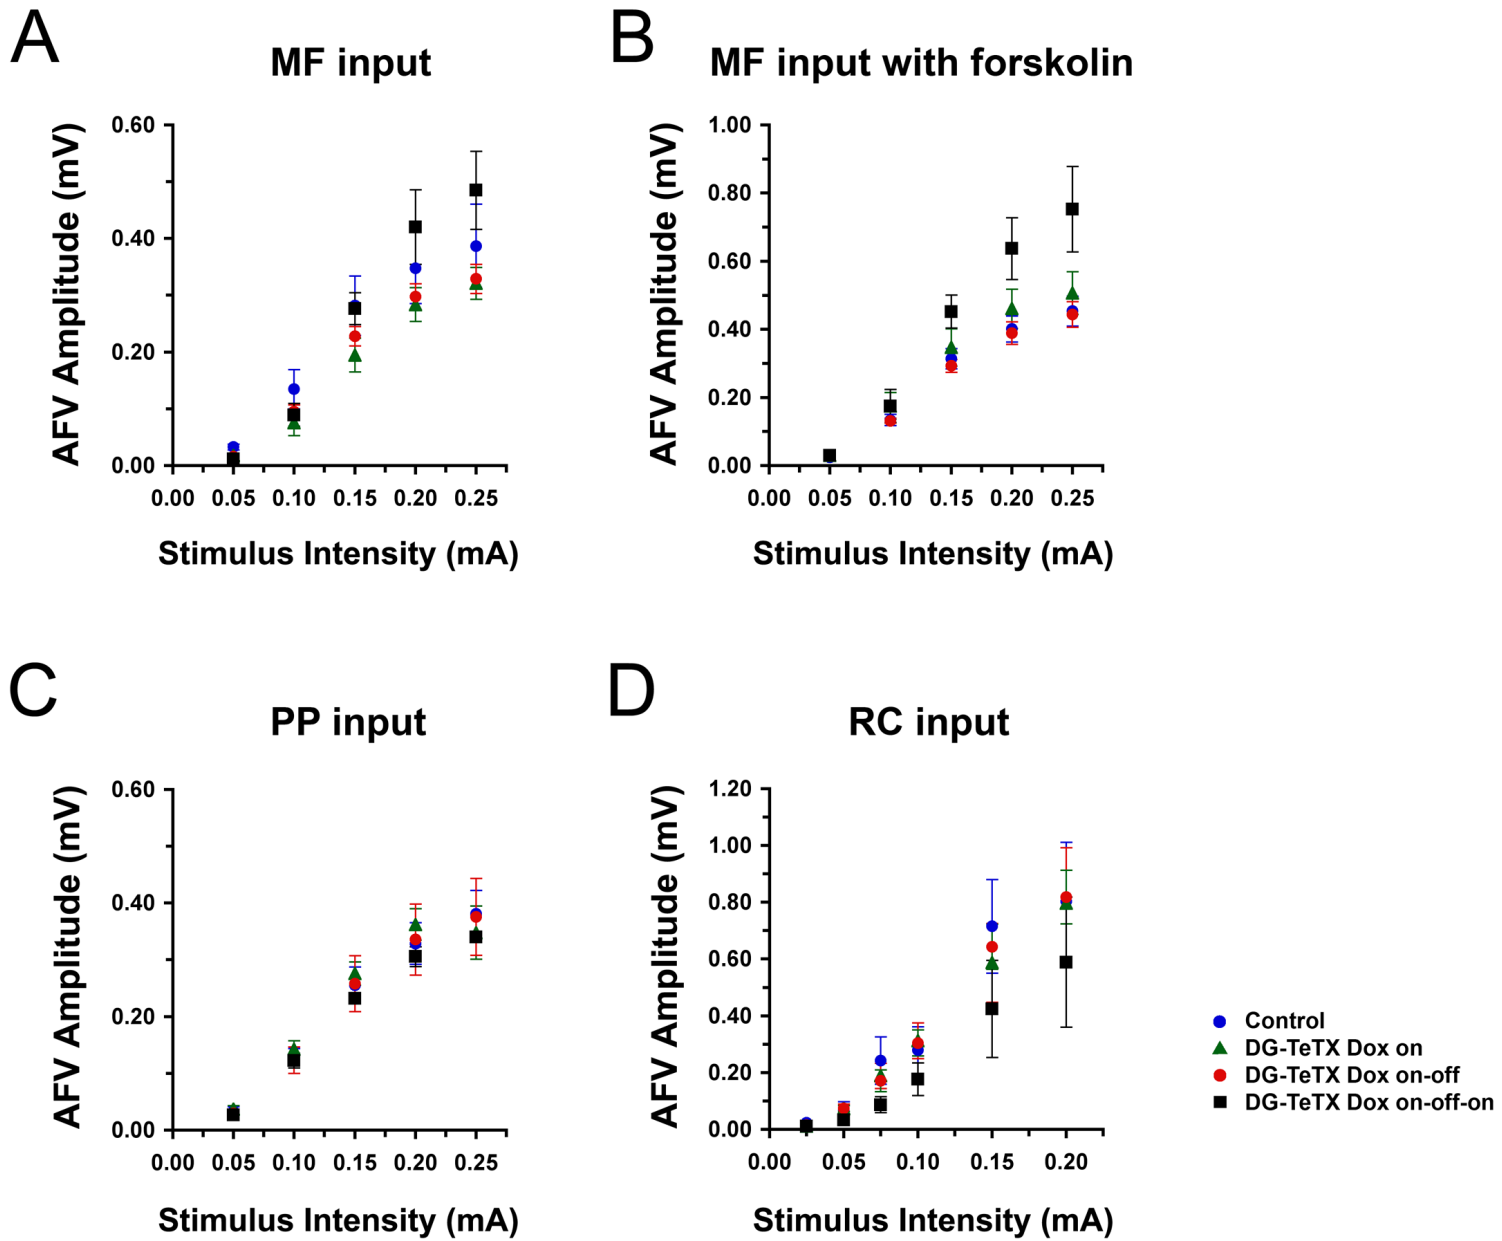

Supplemental Figure 3  
**Figure S3**

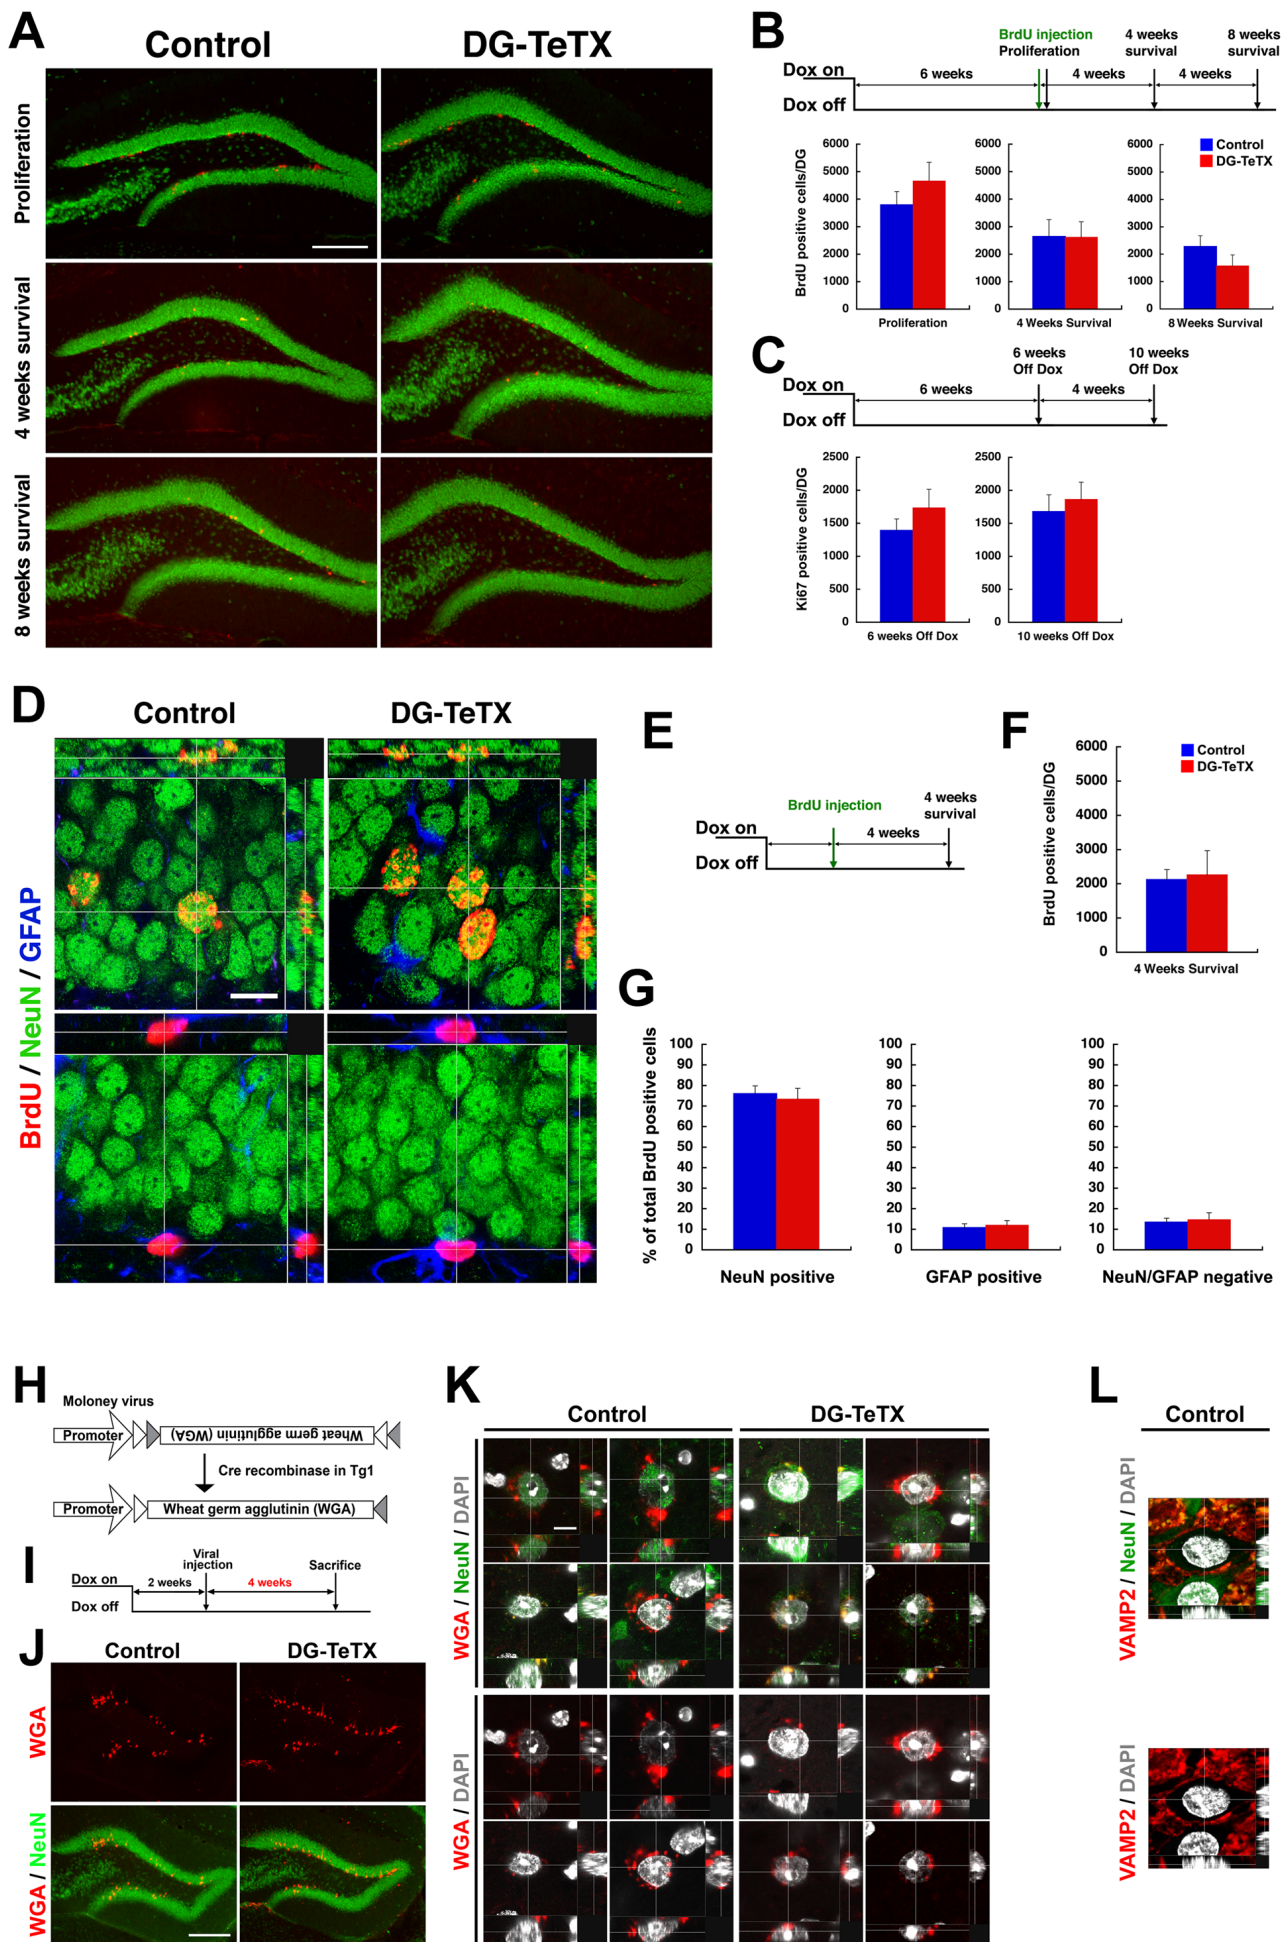

## Figure S4

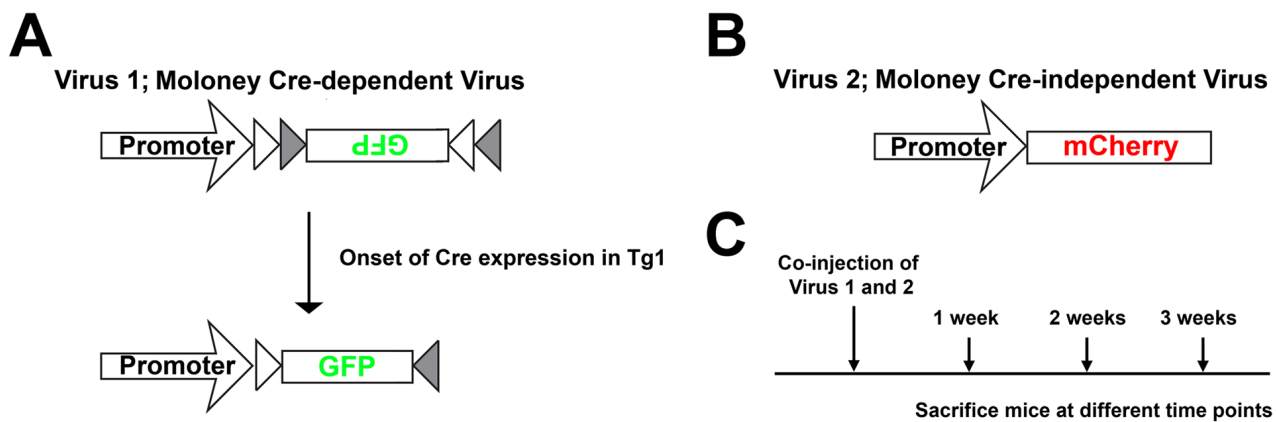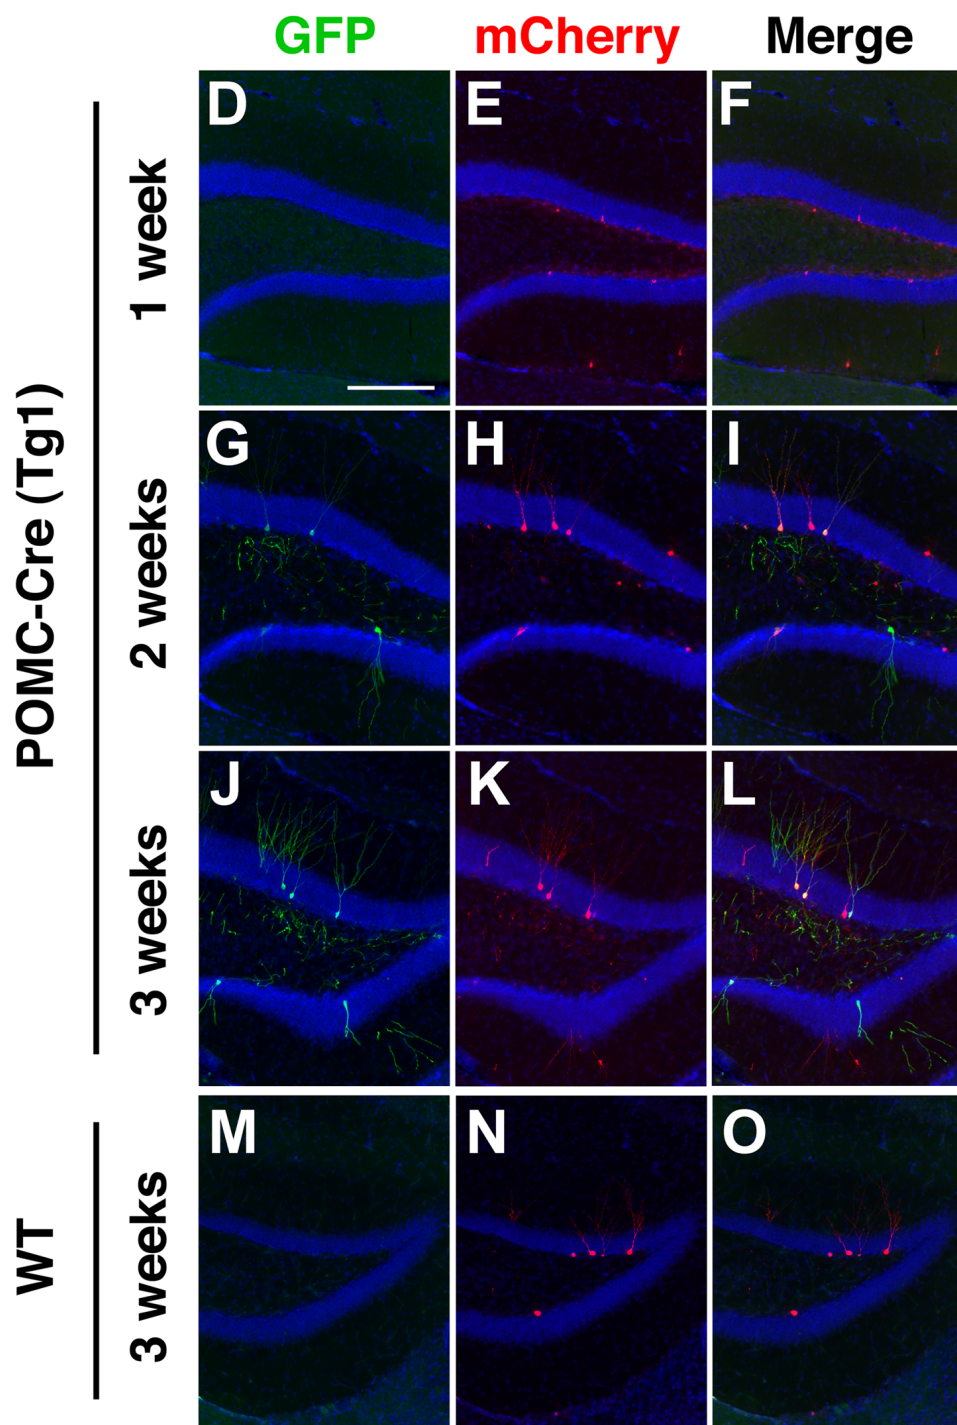

# Figure S5

## A

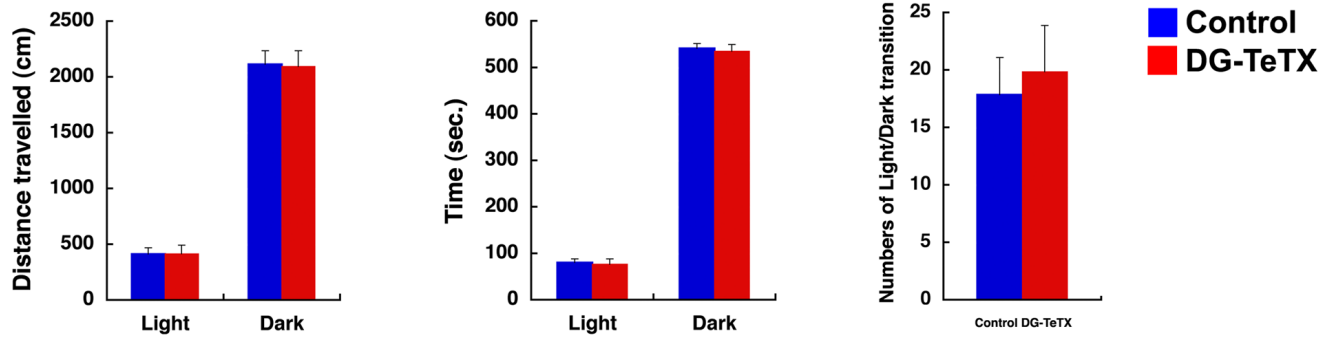

## B

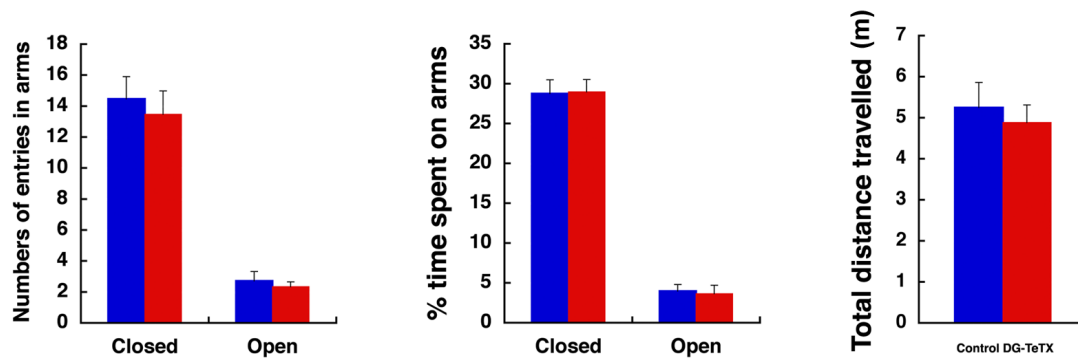

## C

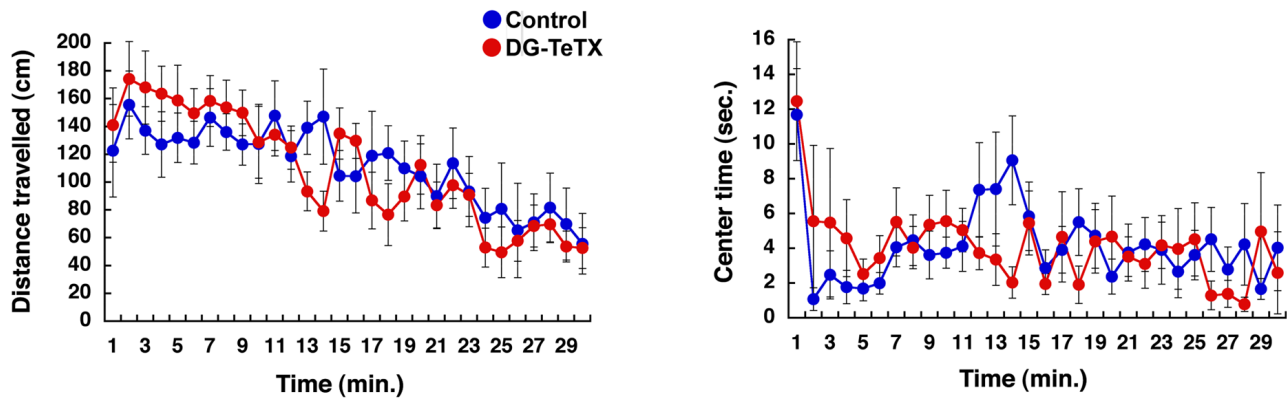

## D

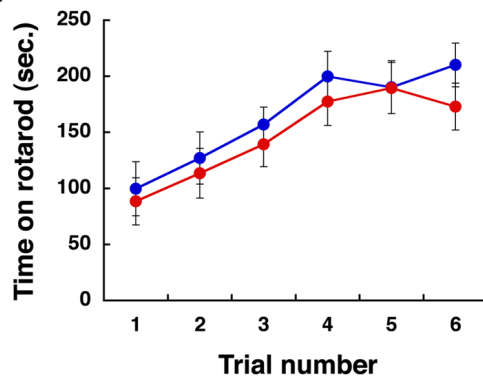

## E

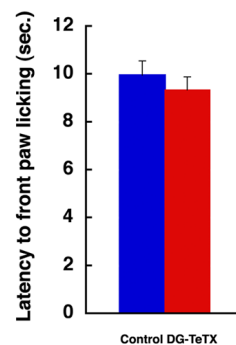

# Figure S6

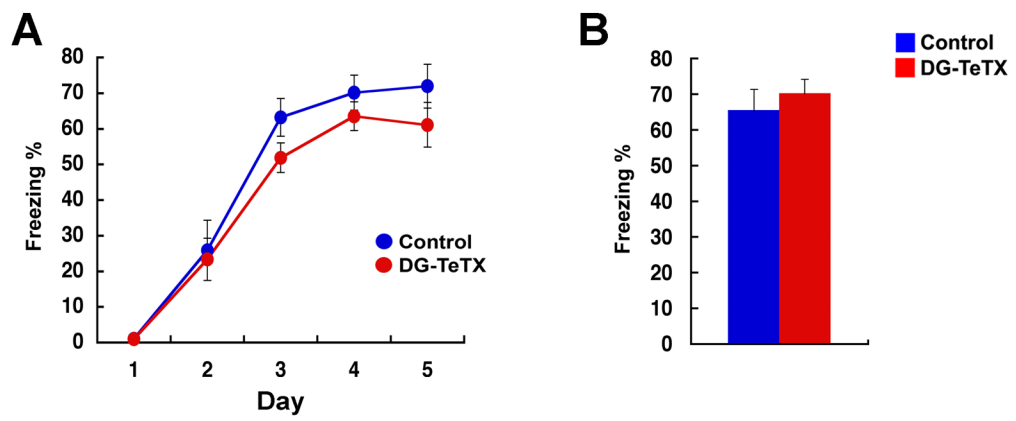

## Figure S7

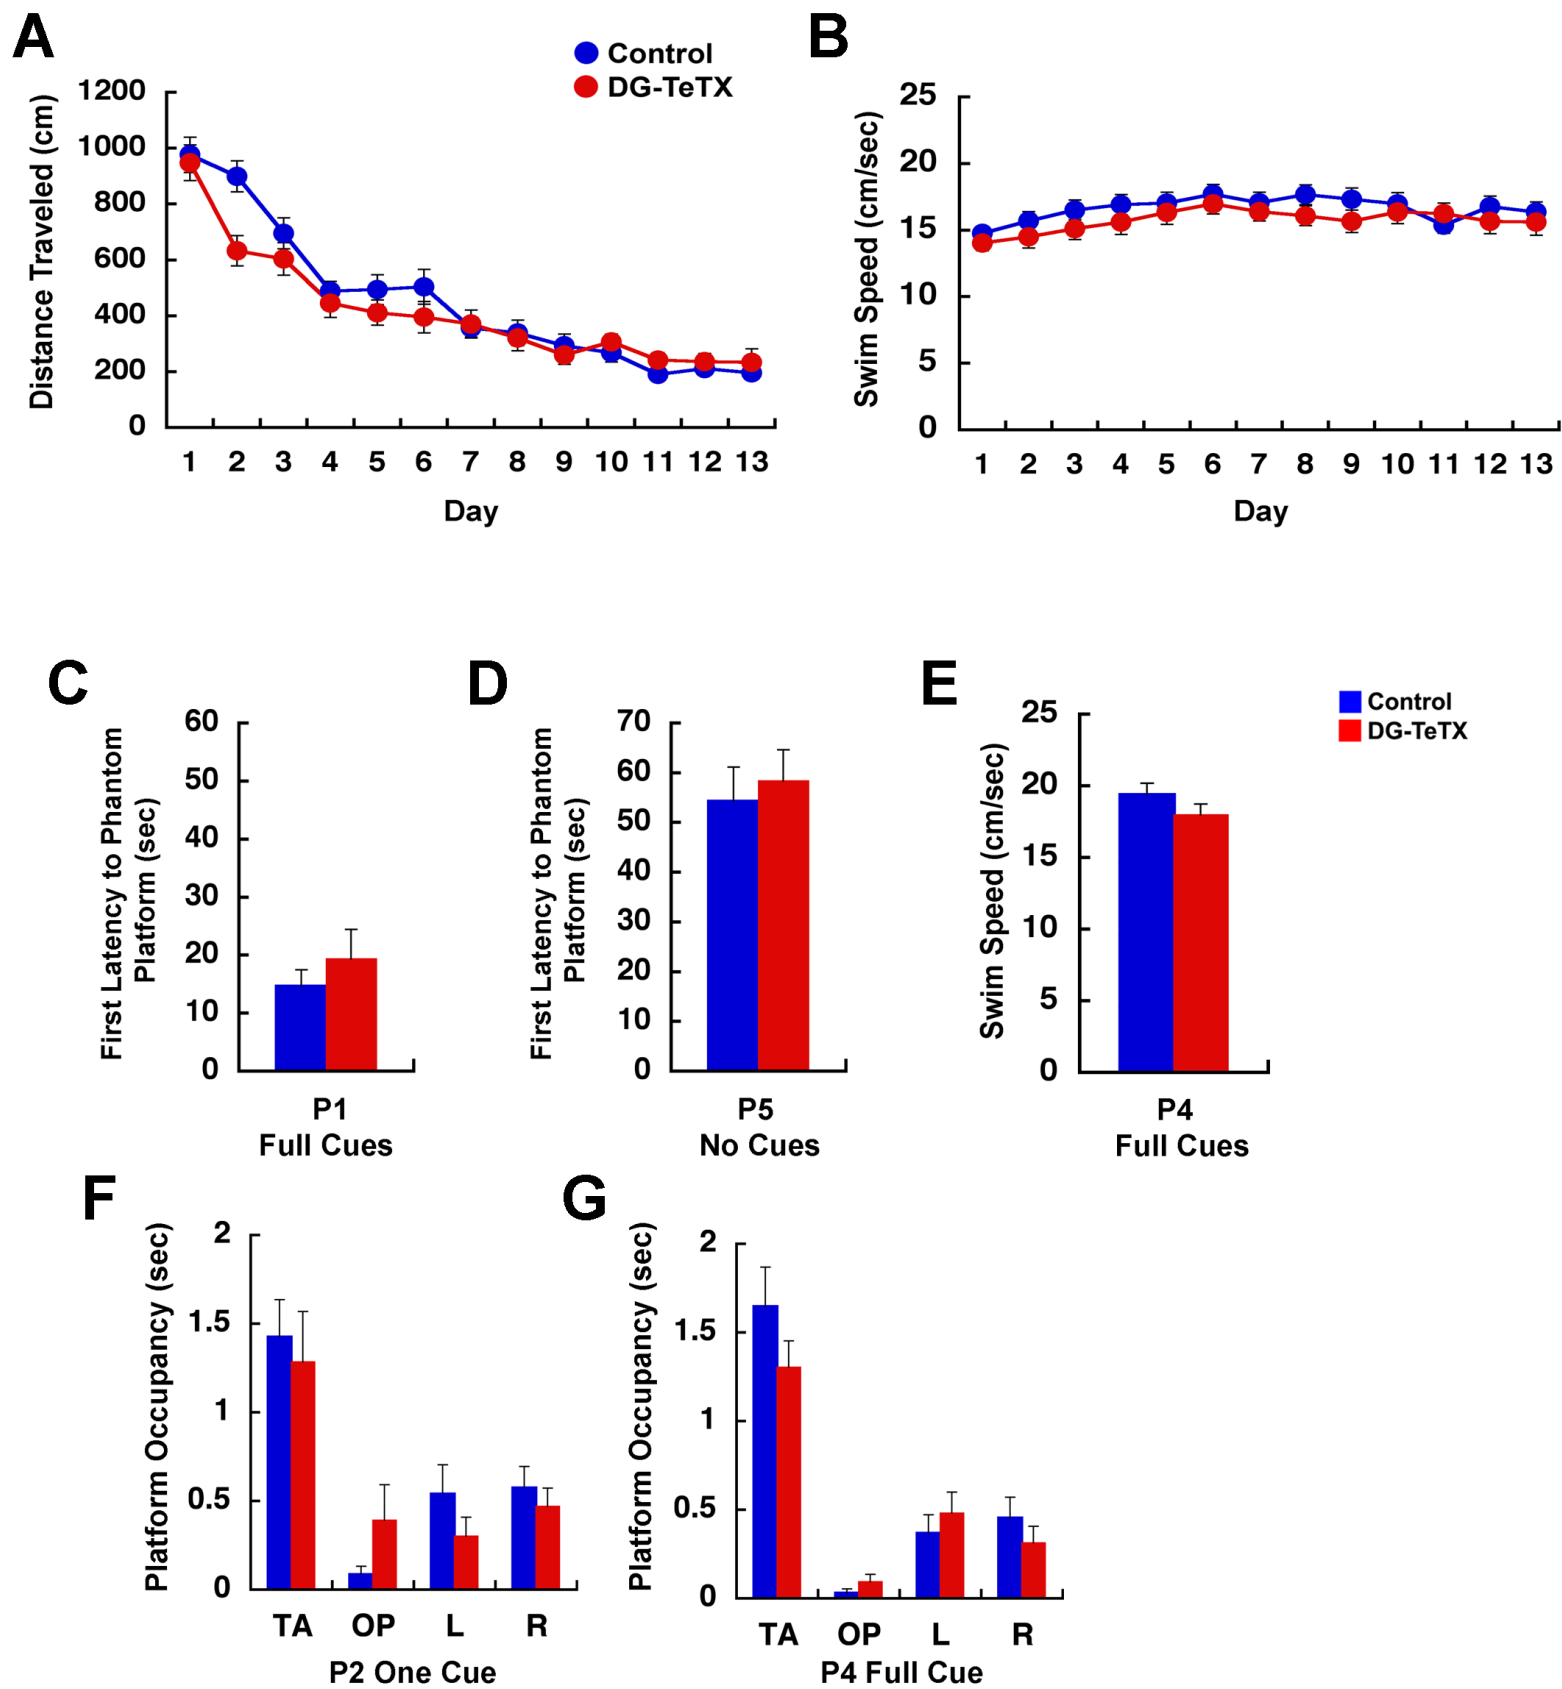

Supplement: NIHMS354871-supplement-02.pdf [file NIHMS354871-supplement-02.pdf]
